# Supplementary material
Source: PubMed Central journal article supplement (PMC9066843)
Supplement: 13071_2022_5262_MOESM1_ESM.pdf [file 13071_2022_5262_MOESM1_ESM.pdf]

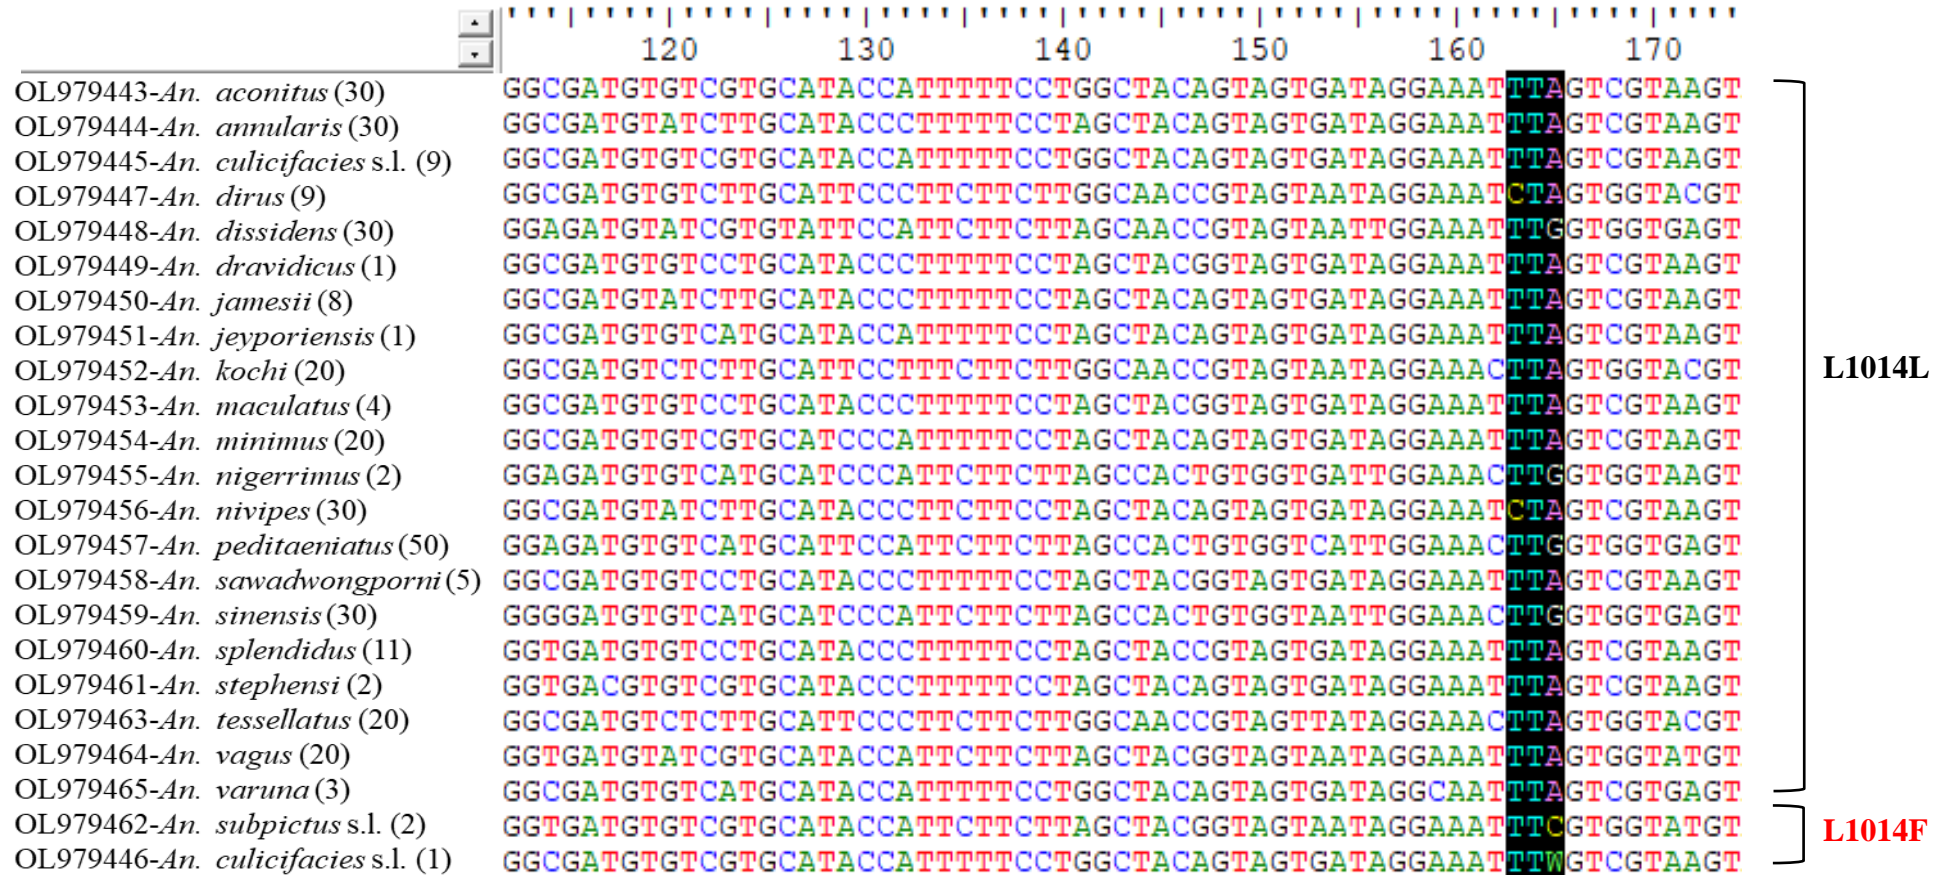

Figure S1 Partial sequences showing the *kdr* L1014 allele (highlighted) in the 22 *Anopheles* species identified in the northern-central Myanmar. Numbers in parentheses indicate the sample size. GenBank accession: OL979443-OL979465.
